# Supplementary material for: Developing clinical decision tools to implement chronic disease prevention and screening in primary care: the BETTER 2 program (building on existing tools to improve chronic disease prevention and screening in primary care)
Source: PubMed Central journal article supplement (PMC4523915; doi:10.1186/s13012-015-0299-9), 2015-08-04

PATIENT INITIALS: \_\_\_ \_\_\_ \_\_\_

**SECTION B: Lab Results** (Record most recent value within date range)

|                                                     | Not Recorded | Recorded<br><i>Details recorded in chart</i> | Date of Lab Results<br>dd/mmm/yyyy | Requires PP<br>Follow-up                                 |
|-----------------------------------------------------|--------------|----------------------------------------------|------------------------------------|----------------------------------------------------------|
| 1. Fasting Blood Sugar:<br><i>(in past 3 years)</i> | _____        | a. _____ mmol/L                              | ___/___/___/___/___/___            | <input type="checkbox"/> No <input type="checkbox"/> Yes |
| 2. HbA1c:                                           | _____        | a. _____%                                    | ___/___/___/___/___/___            | <input type="checkbox"/> No <input type="checkbox"/> Yes |
| 3. Total Cholesterol:                               | _____        | a. _____ mmol/L                              | ___/___/___/___/___/___            | <input type="checkbox"/> No <input type="checkbox"/> Yes |
| 4. HDL:                                             | _____        | a. _____ mmol/L                              | ___/___/___/___/___/___            | <input type="checkbox"/> No <input type="checkbox"/> Yes |
| 5. LDL:                                             | _____        | a. _____ mmol/L                              | ___/___/___/___/___/___            | <input type="checkbox"/> No <input type="checkbox"/> Yes |

**SECTION C: Screening Tests** (If first visit, past 2 years except for: Pap Smear – past 3, Sigmoidoscopy – past 5 and Colonoscopy – past 10 years)  
If patient is <50 yo, colorectal cancer screen is not applicable. If patient is <50 yo and female, breast cancer screen is not applicable.

| Screening Test   | a. Test Completed      |                 |                  |           | If RECORDED and COMPLETED:<br>Date most recent Completed |     |      | Requires PP<br>Follow-up                                 |
|------------------|------------------------|-----------------|------------------|-----------|----------------------------------------------------------|-----|------|----------------------------------------------------------|
|                  | Test Not<br>Applicable | Not<br>Recorded | Recorded         |           | DD                                                       | MMM | YYYY |                                                          |
|                  |                        |                 | Not<br>completed | Completed |                                                          |     |      |                                                          |
| 1. FOBT/FIT      |                        |                 |                  |           |                                                          |     |      | <input type="checkbox"/> No <input type="checkbox"/> Yes |
| 2. Sigmoidoscopy |                        |                 |                  |           |                                                          |     |      | <input type="checkbox"/> No <input type="checkbox"/> Yes |
| 3. Colonoscopy   |                        |                 |                  |           |                                                          |     |      | <input type="checkbox"/> No <input type="checkbox"/> Yes |
| 4. Pap Smear     |                        |                 |                  |           |                                                          |     |      | <input type="checkbox"/> No <input type="checkbox"/> Yes |
| 5. Mammogram     |                        |                 |                  |           |                                                          |     |      | <input type="checkbox"/> No <input type="checkbox"/> Yes |

**SECTION D: Health Conditions** (If patient male do not record details for breast, cervical & ovarian cancer)  
Do not complete this section for follow-up visits.

| Health Condition                                                                                    | Patient has health condition |                 |                 |           | If<br>RECORDED:<br>Age<br>Diagnosed | Eligible for<br>Screen                                   |
|-----------------------------------------------------------------------------------------------------|------------------------------|-----------------|-----------------|-----------|-------------------------------------|----------------------------------------------------------|
|                                                                                                     | Not<br>Applicable            | Not<br>Recorded | Recorded        |           |                                     |                                                          |
|                                                                                                     |                              |                 | No<br>Condition | Condition |                                     |                                                          |
| 1a. Diabetes                                                                                        |                              |                 |                 |           |                                     | <input type="checkbox"/> No <input type="checkbox"/> Yes |
| 1b. Gestational                                                                                     |                              |                 |                 |           |                                     |                                                          |
| 1c. Impaired FBS/glucose                                                                            |                              |                 |                 |           |                                     |                                                          |
| 2. Cardiovascular Disease (angina, congestive heart failure, heart attack, coronary artery disease) |                              |                 |                 |           |                                     | <input type="checkbox"/> No <input type="checkbox"/> Yes |
| 3. Breast Cancer<br><i>if Condition complete 3a</i>                                                 |                              |                 |                 |           |                                     | <input type="checkbox"/> No <input type="checkbox"/> Yes |
| 3a. Breast Cancer type 1 (BRCA1) or Breast Cancer type 2 (BRCA2) gene mutation                      |                              |                 |                 |           |                                     |                                                          |
| 4. Cervical Cancer                                                                                  |                              |                 |                 |           |                                     | <input type="checkbox"/> No <input type="checkbox"/> Yes |
| 5. Colorectal Cancer<br><i>If Condition complete 5a</i>                                             |                              |                 |                 |           |                                     | <input type="checkbox"/> No <input type="checkbox"/> Yes |

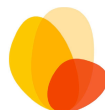

PATIENT INITIALS: \_\_\_ \_\_\_ \_\_\_

| Health Condition                                | Patient has health condition |              |              |           | If RECORDED: Age Diagnosed | Eligible for Screen                                      |
|-------------------------------------------------|------------------------------|--------------|--------------|-----------|----------------------------|----------------------------------------------------------|
|                                                 | Not Applicable               | Not Recorded | Recorded     |           |                            |                                                          |
|                                                 |                              |              | No Condition | Condition |                            |                                                          |
| 5a. Polyps                                      |                              |              |              |           |                            |                                                          |
| 6. High Cholesterol (Hyperlipidemia, lipidemia) |                              |              |              |           |                            | <input type="checkbox"/> No <input type="checkbox"/> Yes |
| 7. Hypertension                                 |                              |              |              |           |                            | <input type="checkbox"/> No <input type="checkbox"/> Yes |
| 8. Ovarian Cancer                               |                              |              |              |           |                            | <input type="checkbox"/> No <input type="checkbox"/> Yes |

**SECTION E: Patient Self-Reported Family History Risk** (Source of information is Health Survey)

Requires PP Follow-up

Is the patient at increased familial risk for:

- |                                  |                                                          |                                                          |
|----------------------------------|----------------------------------------------------------|----------------------------------------------------------|
| 1. Diabetes?                     | <input type="checkbox"/> No <input type="checkbox"/> Yes | <input type="checkbox"/> No <input type="checkbox"/> Yes |
| 2. Breast Cancer?                | <input type="checkbox"/> No <input type="checkbox"/> Yes | <input type="checkbox"/> No <input type="checkbox"/> Yes |
| 3. Colorectal/Bowel Cancer?      | <input type="checkbox"/> No <input type="checkbox"/> Yes | <input type="checkbox"/> No <input type="checkbox"/> Yes |
| 4. Cardiovascular/Heart Disease? | <input type="checkbox"/> No <input type="checkbox"/> Yes | <input type="checkbox"/> No <input type="checkbox"/> Yes |

**SECTION F: Framingham Risk Assessment** (Record value calculated if able)

|                     | Not Available | Value From Chart | Visit | Risk Value | Date Risk Assessment Completed<br>dd/mmm/yyyy | Requires PP Follow-up                                    |
|---------------------|---------------|------------------|-------|------------|-----------------------------------------------|----------------------------------------------------------|
| 1. Framingham Risk: | ___           | ___              | ___   | ____.____% | ___/___/___/___/___/___                       | <input type="checkbox"/> No <input type="checkbox"/> Yes |

**SECTION G: Mental Health Screen** (Source of information is Health Survey)

Requires PP Follow-up

1. Patient Health Questionnaire 2 question screen for depression positive?  No  Yes  No  Yes

**SECTION H: Lifestyle** (Sources of information are the patient's chart and Health Survey. If date details recorded unknown, still record details)

Requires PP Follow-up

1. Is information regarding the patient's alcohol consumption recorded in their chart?  No  Yes
- a. Is the patient identified as a binge drinker? (Health Survey)  No  Yes  No  Yes
- b. What is the patient's alcohol consumption? (Health Survey)
- b1. Number of drinks \_\_\_\_\_ PER  Day  Week  Month  No  Yes
2. AUDIT-C alcohol screen positive? (Health Survey)  No  Yes  No  Yes
3. Is patient smoking status recorded in their chart?  No  Yes → specify below
- a. What is the patient's smoking status? (Chart)  Non-smoker  Ex-smoker  Current Smoker  Quitting
- b. How many cigarettes does the patient smoke? (Health Survey) \_\_\_\_\_ PER  Day  Week  No  Yes

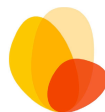

PATIENT INITIALS: \_\_\_ \_\_\_ \_\_\_

Requires PP Follow-up

- 4. Are details regarding the patient’s physical activity recorded in their chart?  No  Yes
  - a. Number of minutes of exercise per week? (Health Survey) \_\_\_\_\_ minutes per week  No  Yes
- 5. General Practice Physical Activity Questionnaire score (Health Survey) \_\_\_\_\_  No  Yes
- 6. Are details regarding the patients diet/nutrition recorded their chart?  No  Yes
- 7. Starting the Conversation Nutrition Questionnaire score (Health Survey) \_\_\_\_\_  No  Yes

**SECTION I: Current Medications** *(Indicate whether the patient was prescribed medications for the following within date range)*

| Medications                                                         | a. Currently Prescribed |     |
|---------------------------------------------------------------------|-------------------------|-----|
|                                                                     | No                      | Yes |
| 1. Blood Pressure                                                   |                         |     |
| 2. Diabetes                                                         |                         |     |
| 3. Cholesterol                                                      |                         |     |
| 4. Smoking Cessation                                                |                         |     |
| 5. Alcohol Cessation                                                |                         |     |
| 6. Mental Health (ex. depression, anxiety, psychosomatic disorders) |                         |     |

**SECTION J: Name of Primary Care Provider and/or Clinic** *(Record information for the healthcare provider(s) responsible for the patient’s ongoing medical care and the care that they provide)*

Primary Care Provider: \_\_\_\_\_

Clinic: \_\_\_\_\_

Type of Medical Care: \_\_\_\_\_

Primary Care Provider: \_\_\_\_\_

Clinic: \_\_\_\_\_

Type of Medical Care: \_\_\_\_\_

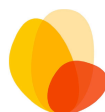

PATIENT INITIALS: \_\_\_ \_\_\_ \_\_\_

**SECTION K: Referrals or Discussions arranged with Health Professionals (FP, PP, Nurse Practitioner, Dietician, Nutritionist, Pharmacist), Specialists or Programs** *(To be completed after Prevention Visit with patient)*

| Referral or Discussion Regarding: | a. Referral |         |                               | b. Referral to                  |                           |                           | c. Referral Details |           |               | Requires PP Follow-up                                    |
|-----------------------------------|-------------|---------|-------------------------------|---------------------------------|---------------------------|---------------------------|---------------------|-----------|---------------|----------------------------------------------------------|
|                                   | Offered     | Refused | Accepted or Patient Initiated | Primary Care Provider (e.g. FP) | Internal resource/program | External resource/program | In Progress         | Completed | Not Completed |                                                          |
| 1. Cardiology/Heart Disease       |             |         |                               |                                 |                           |                           |                     |           |               | <input type="checkbox"/> No <input type="checkbox"/> Yes |
| 2. Diabetes                       |             |         |                               |                                 |                           |                           |                     |           |               | <input type="checkbox"/> No <input type="checkbox"/> Yes |
| 3. Hypertension                   |             |         |                               |                                 |                           |                           |                     |           |               | <input type="checkbox"/> No <input type="checkbox"/> Yes |
| 4. Cholesterol                    |             |         |                               |                                 |                           |                           |                     |           |               | <input type="checkbox"/> No <input type="checkbox"/> Yes |
| 5. Nutrition/Diet                 |             |         |                               |                                 |                           |                           |                     |           |               | <input type="checkbox"/> No <input type="checkbox"/> Yes |
| 6. Weight control                 |             |         |                               |                                 |                           |                           |                     |           |               | <input type="checkbox"/> No <input type="checkbox"/> Yes |
| 7. Physical activity or exercise  |             |         |                               |                                 |                           |                           |                     |           |               | <input type="checkbox"/> No <input type="checkbox"/> Yes |
| 8. Alcohol cessation              |             |         |                               |                                 |                           |                           |                     |           |               | <input type="checkbox"/> No <input type="checkbox"/> Yes |
| 9. Smoking cessation              |             |         |                               |                                 |                           |                           |                     |           |               | <input type="checkbox"/> No <input type="checkbox"/> Yes |

**SECTION L: Notes** *(Consider capturing information of programs patients have referred themselves to. In particular, those that may become resources to the practice)*

---



---



---



---



---



---



---



---

Time spent administering Health Survey to patient (mins.): \_\_\_\_\_

Time spent completing this form to prepare for Prevention Visit (mins.): \_\_\_\_\_

Time spent on Prevention Visit (mins.): \_\_\_\_\_

Signature \_\_\_\_\_

Date Signed (dd-mmm-yyyy): \_\_\_|\_\_\_ / \_\_\_|\_\_\_|\_\_\_ / \_\_\_|\_\_\_|\_\_\_

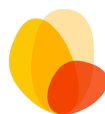

Supplement: 13012_2015_299_MOESM4_ESM.pdf [file 13012_2015_299_MOESM4_ESM.pdf]
