# Supplementary material for: Developing clinical decision tools to implement chronic disease prevention and screening in primary care: the BETTER 2 program (building on existing tools to improve chronic disease prevention and screening in primary care)
Source: PubMed Central journal article supplement (PMC4523915; doi:10.1186/s13012-015-0299-9), 2015-08-04
Supplement: 13012_2015_299_MOESM3_ESM.pdf [file 13012_2015_299_MOESM3_ESM.pdf]

# The BETTER Chronic Disease Primary Prevention and Screening Map

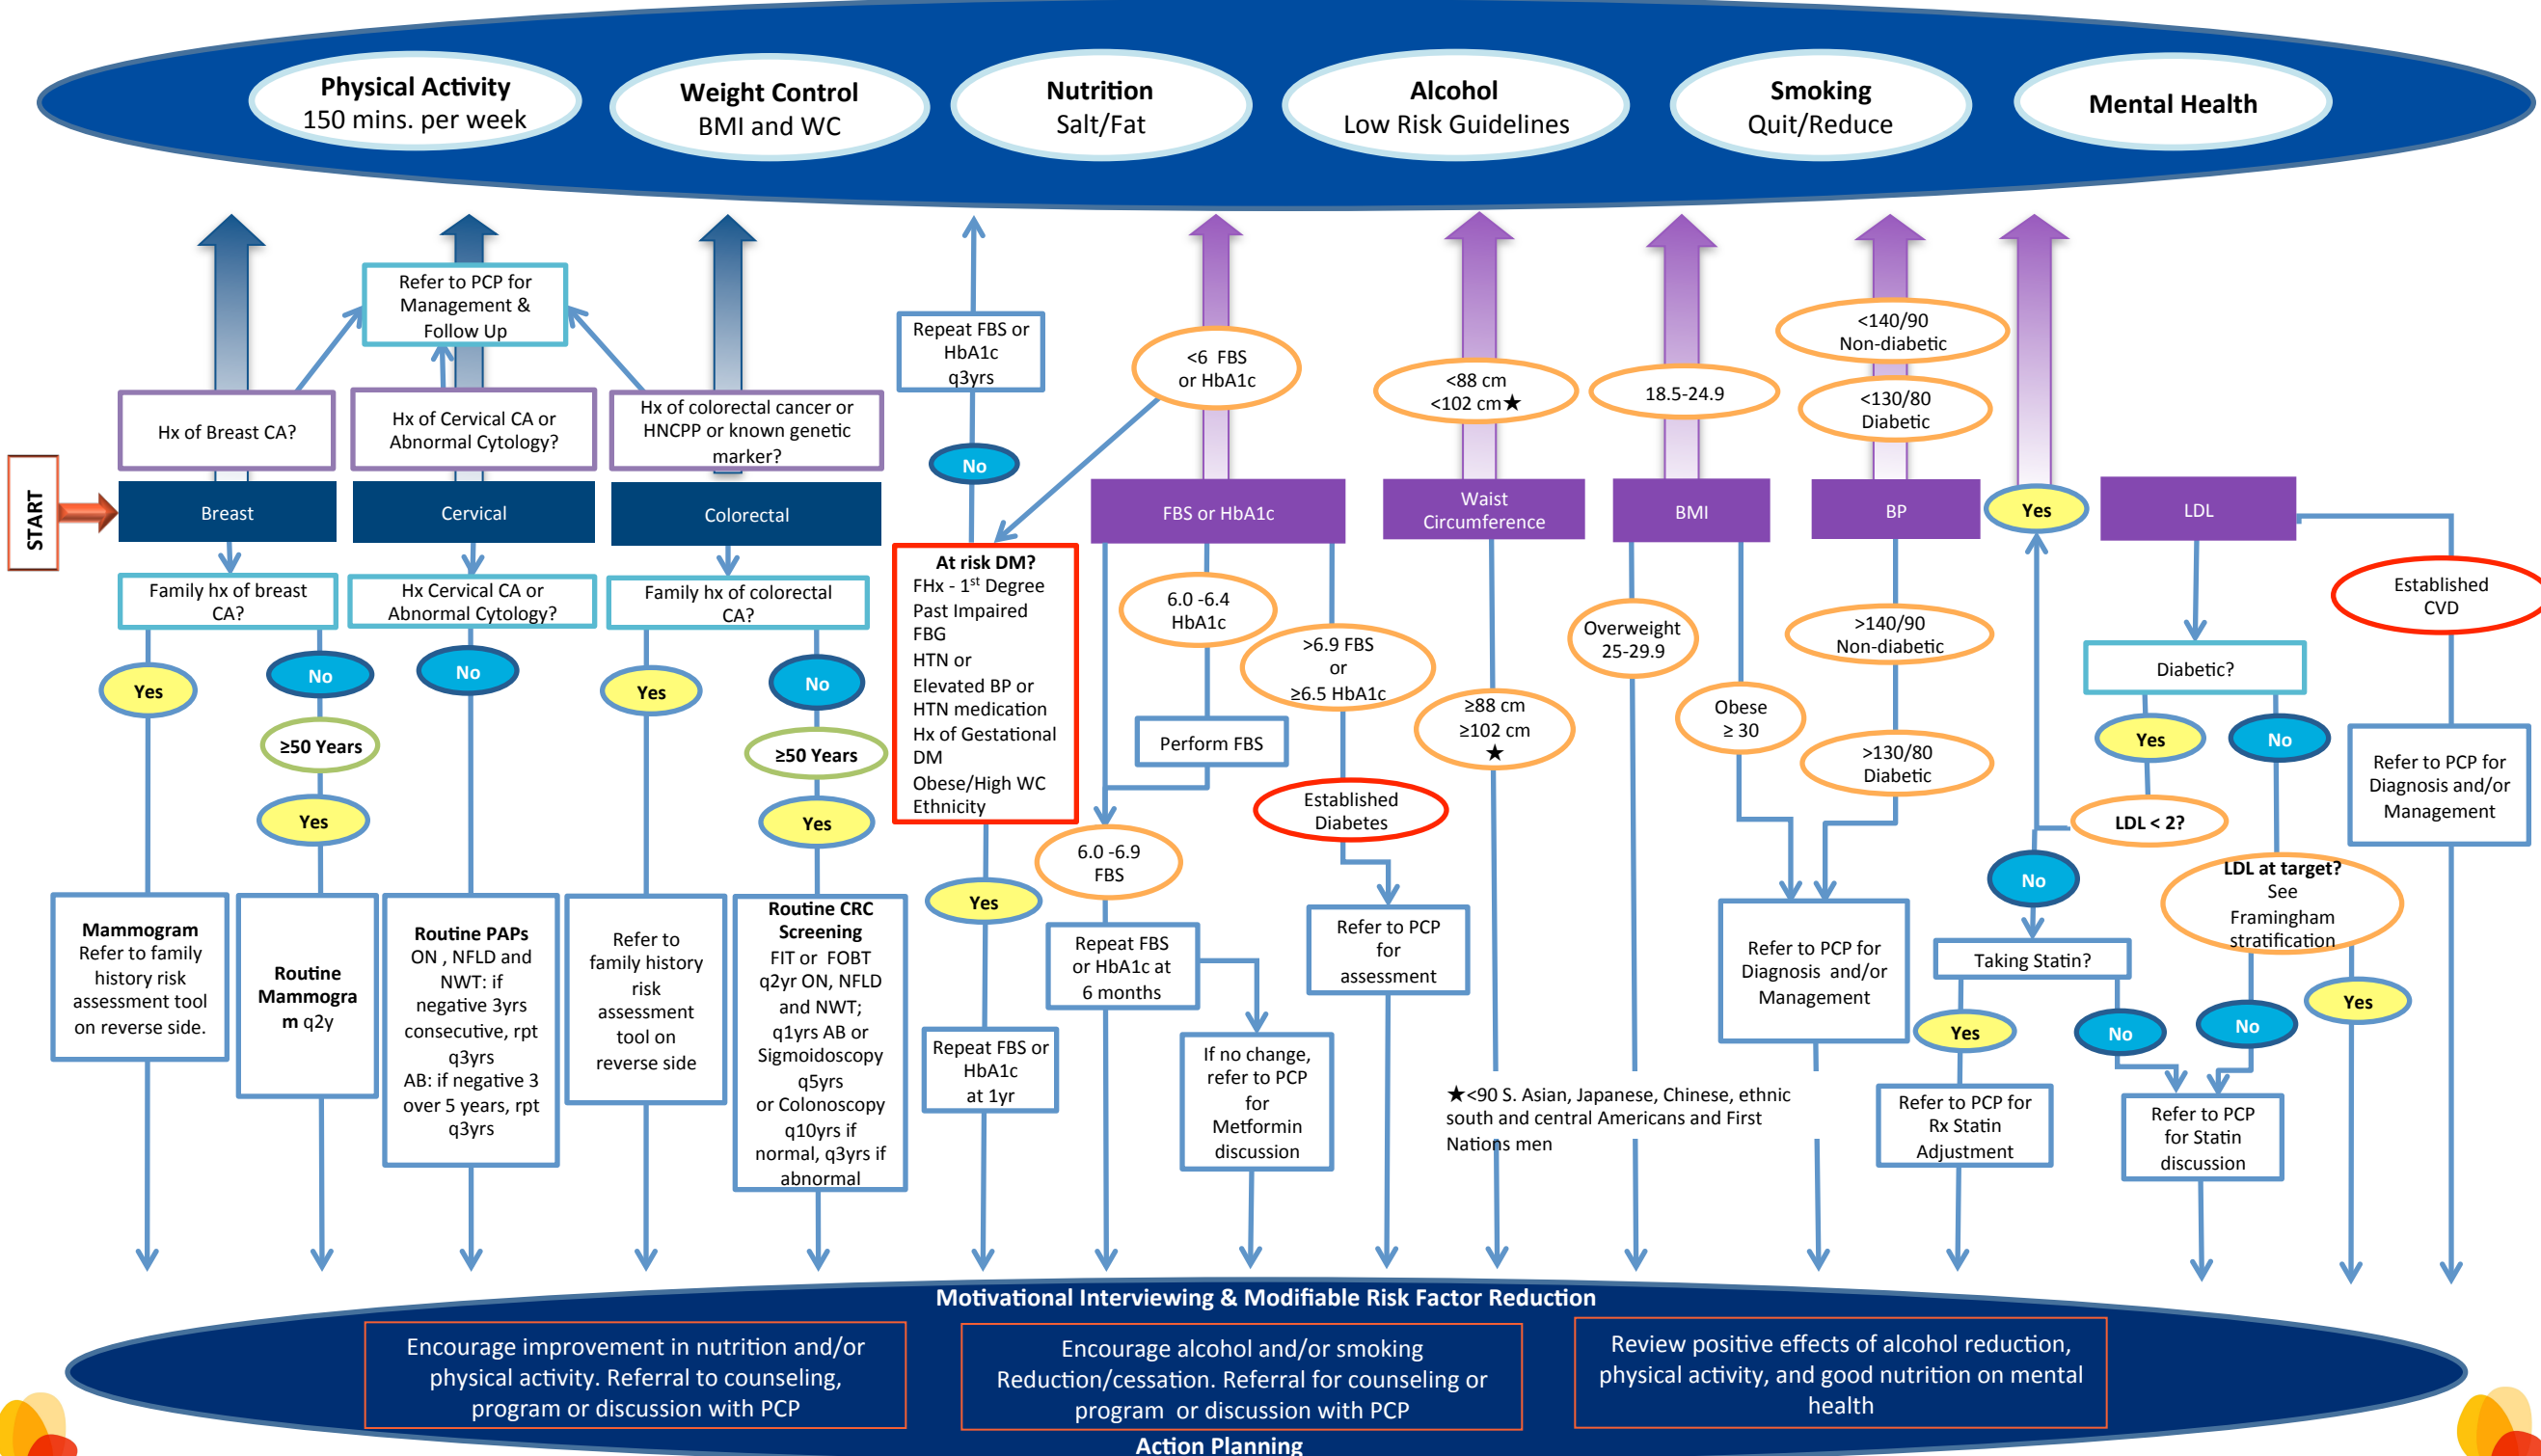

## Framingham Risk Stratification

| Risk Level                                   | Initiate treatment if:                                                                                                                  | Primary treatment target: LDL-C                     |
|----------------------------------------------|-----------------------------------------------------------------------------------------------------------------------------------------|-----------------------------------------------------|
| <b>HIGH</b><br>(10-year CVD risk $\geq$ 20%) | CAD, PVD,<br>Atherosclerosis*, Most<br>patients with diabetes**                                                                         | $<$ 2.0 mm/L<br><i>or</i><br>50% $\downarrow$ LDL-C |
| <b>MODERATE</b><br>(10-year CVD risk 10-19%) | LDL-c $>$ 3.5 mmol/L<br><i>or</i><br>TC/HDL-C $>$ 5.0<br><i>or</i><br>hsCRP $>$ 2 mg/L in men<br>$>$ 50 years and women<br>$>$ 60 years | $<$ 2.0 mm/L<br><i>or</i><br>50% $\downarrow$ LDL-C |
| <b>LOW</b><br>(10-year CVD risk $<$ 10%)     | LDL-C<br>$\geq$ 5.0 mmol/L                                                                                                              | 50% $\downarrow$ LDL-C                              |

**Note:** In patients with a family history of CVD in a first-degree relative before age 60, the calculated 10-year CVD risk should be **multiplied by 2**.

\*Evidence of atherosclerosis = vascular bruits, ABI  $<$ 0.9, documented CAD, CVA, (TIA or evidence of carotid disease) or peripheral vascular disease

\*\*In men  $>$  45 years, women  $>$ 50 years with diabetes, as well as some younger people with diabetes who have additional risk as per CDA guidelines.

Source: Pfizer Inc., Cardiovascular Risk Assessment. CA0109LI024E.

## Family History (FH) Risk Assessment Tool

| Disease                        | Elevated Risk                                                                                                                                                                                                                                                                                                                                                                                                                                                                                                                                                                               | Screening Action                                                                                                                                                                                                                                                                                                                                                                                                                                                                                                                                                                                                                                          |
|--------------------------------|---------------------------------------------------------------------------------------------------------------------------------------------------------------------------------------------------------------------------------------------------------------------------------------------------------------------------------------------------------------------------------------------------------------------------------------------------------------------------------------------------------------------------------------------------------------------------------------------|-----------------------------------------------------------------------------------------------------------------------------------------------------------------------------------------------------------------------------------------------------------------------------------------------------------------------------------------------------------------------------------------------------------------------------------------------------------------------------------------------------------------------------------------------------------------------------------------------------------------------------------------------------------|
| <b>Breast Cancer (BC)</b>      | <ul style="list-style-type: none"> <li><math>\geq</math> 2 cases of BC on same side of family, especially: <ul style="list-style-type: none"> <li>In closely related relatives</li> <li>In more than one generation</li> <li>When BC is diagnosed <math>&lt;</math> age 50</li> </ul> </li> <li><i>or</i></li> <li>Any case of ovarian cancer <i>or</i> Bilateral BC <i>or</i> BC in male relative <i>or</i> BC age <math>&lt;</math> 60 in Ashkenazi Jewish women <i>or</i> Identified BRCA1 or BRCA2 mutation in a 1st degree relative and patient has not had genetic testing</li> </ul> | <p>Consider referral to a genetics clinic.</p> <p>Annual screening with MRI in addition to mammography starting at age 30</p>                                                                                                                                                                                                                                                                                                                                                                                                                                                                                                                             |
| <b>Colorectal Cancer (CRC)</b> | <p>Any family history of:<br/>CRC <i>or</i><br/>Multiple cancers (CRC or associated cancers) <i>or</i><br/>Cancers at a young age (<math>&lt;</math> 50, particularly if <math>&lt;</math>35)<br/><b>OR</b><br/>Personal history of inflammatory Bowel Disease (chronic ulcerative colitis or Crohn's disease)</p>                                                                                                                                                                                                                                                                          | <p>One 1st degree relative with CRC <math>&gt;</math> 60 <i>or</i> <math>\geq</math> two 2nd degree relatives with CRC <i>or</i> One 2nd/3rd degree relative with CRC – FOBT or FIT q2 years.</p> <p>One 1st degree relative with CRC <math>&lt;</math> 60 <i>or</i> <math>\geq</math> two 1st degree relatives with CRC any age – Colonoscopy q5 years beginning age 40 or 10 years earlier than youngest dx of cancer, whichever comes first.</p> <p>One 1st degree relative with CRC <math>&lt;</math> 50 – consider referral to genetics</p> <p>Personal history of inflammatory bowel disease – Colonoscopy beginning 8-10 years after diagnosis</p> |
| <b>CHD</b>                     | 1st degree relative diagnosed with CHD* age $<$ 60                                                                                                                                                                                                                                                                                                                                                                                                                                                                                                                                          | No specific action, modifies Framingham                                                                                                                                                                                                                                                                                                                                                                                                                                                                                                                                                                                                                   |
| <b>Diabetes</b>                | 1st degree relative                                                                                                                                                                                                                                                                                                                                                                                                                                                                                                                                                                         | q1 year                                                                                                                                                                                                                                                                                                                                                                                                                                                                                                                                                                                                                                                   |

\*CHD = angina, MI and CHF.
